# Supplementary material for: Characterisation of the GRAF gene promoter and its methylation in patients with acute myeloid leukaemia and myelodysplastic syndrome
Source: PubMed Central journal article supplement (PMC2361128; doi:10.1038/sj.bjc.6602939), 2006-01-10
Supplement: 94-6602939x1.pdf [file 94-6602939x1.pdf]

## Supplementary data

With the primers noted in Table A and 1ng of a cloned putative *GRAF*-promoter as the template, it was possible to generate different fragments of the 5'-flanking region of *GRAF*. After purification (QIAquick Spin Kits from Qiagen, Hilden, Germany) and restriction (*Hind*III and *Bgl*II, Boehringer Mannheim, Germany) using conventional methods the PCR-products were cloned into the *Hind*III/*Bgl*II digested pGL3-BasicVector (Promega, Mannheim, Germany).

**Table A**

Primer sequences for the generation of promoter fragments

Artificial restriction sites: Sense primers: AGATCT, *Bgl*II, #

Antisense primers: AAGCTT, *Hind*III, §

| Name                | First base | Nucleotide sequence (5'→3')       | Last base | Orientation |
|---------------------|------------|-----------------------------------|-----------|-------------|
| <i>Prom up 1482</i> | -1482      | §+#CACGTAGCTGAAGGAGGGCTGCTGGTTCC  | -1454     | Sense       |
| <i>Prom up 981</i>  | -981       | §+#ACCGTGGGCGGGTTCTGAGCAGGAGTGGCC | -952      | Sense       |
| <i>Prom up 576</i>  | -576       | #GAGTTTGCCTGCGGACCTAGGCGTTGG      | -560      | Sense       |
| <i>Prom up 507</i>  | -507       | #CTTTGATTGGATCAAGACCGCGGAAGGGCC   | -478      | Sense       |
| <i>Prom up 242</i>  | -242       | #GTTTCCTGCTCGCGATCCGCTCCGTTGCC    | -214      | Sense       |
| <i>Prom do 341</i>  | -341       | §TCGAGCGCCCTCTCACAGCAGCCTCGGCC    | -369      | Antisense   |
| <i>Prom do 176</i>  | -176       | §GAGCTCGGACCCGGCCGAGGTGCTGCTGTTCC | -206      | Antisense   |
| <i>Prom do 158</i>  | -158       | §CGCAAGACTCCC GAAGCGAGCTCGGACC    | -185      | Antisense   |
| <i>Prom do 108</i>  | -108       | §GGCTCCACAGGTGTGGCGCTGGCTCACTCC   | -137      | Antisense   |
| <i>Prom do 75</i>   | -75        | §GCGGGACCCCGCCGGCTCCCCGACGGCC     | -104      | Antisense   |
| <i>Prom do 52</i>   | -52        | §CCGCCGCCAGAGCACTCACGCGCGGGAC     | -81       | Antisense   |
| <i>Prom do</i>      | -1         | §+#GTGCGCGCGGCGCCATCCGGGGGCGCGCC  | -31       | Antisense   |

**Table B**

Mutagenesis-primer for promoter constructs with deletion of the footprint regions

| <b>Name</b>       | <b>First base</b> | <b>Nucleotide sequence (5'→3')</b> | <b>Last base</b> | <b>Orientation</b> |
|-------------------|-------------------|------------------------------------|------------------|--------------------|
| <i>Prom s Fp1</i> | -483              | GGGCCGGGCGTCCTCGGGCG               | -464             | Sense              |
| <i>Prom a Fp1</i> | -494              | TTGATCCAATCAAAGGGGCC               | -513             | Antisense          |
| <i>Prom s Fp2</i> | -523              | CCTGCCTCCAGGCCCTTTG                | -504             | Sense              |
| <i>Prom a Fp2</i> | -554              | CGCCTAGGTCCGCAGCGCAAAC             | -575             | Antisense          |

**Table C**

Buffers used in the Preparation of nuclear extracts and DNase I protection assays

| <b>Buffer name</b>  | <b>Composition</b>                                                                                                                                                                                     |
|---------------------|--------------------------------------------------------------------------------------------------------------------------------------------------------------------------------------------------------|
| Hypotonic buffer    | 10mM Hepes; 0.75mM spermidine; 0.15mM spermine; 0.1mM EDTA; 0.1mM EGTA; 1mM DTT; 10mM potassium chloride; 10mM benzamidine; 0.5mM PMSF                                                                 |
| Restore buffer      | 68% sucrose; 50mM Hepes; 0.75mM spermidine; 0.15mM spermine; 10mM potassium chloride; 0.2mM EDTA; 1mM DTT                                                                                              |
| Resuspension buffer | 20mM Hepes; 0.75mM spermidine; 0.15mM spermine; 0.2mM EDTA; 0.2mM EGTA; 2mM DTT; 25% glycerol; 10mM benzamidine; 0.5mM PMSF; mix 9 volumes of this buffer with 1 volume ammonium sulfate solution (4M) |
| Buffer D            | 20mM Hepes; 20% glycerol; 0.1M potassium chloride; 0.2mM EDTA; 0.5mM PMSF; 0.5mM DTT                                                                                                                   |
| Binding buffer      | 10mM Tris-HCl; 1mM EDTA; 0.1mM EGTA; 1mM DTT; 60mM potassium chloride; 5% glycerol                                                                                                                     |
| Stop buffer         | 0.5M sodium acetate; 30mM EDTA; 1%SDS; 0.2µg/ml glycogen                                                                                                                                               |

## Figure legends

*Supplementary Figure 1* Deletion analyses (**B**) of the *GRAF* promoter.

Left panel: The promoter segments (numbering relative to A (=+1) in the START-ATG codon). Right panel: Relative Firefly luciferase activity normalized against the promoting activity of SV40 (=100%). The data represent the mean  $\pm$  SD of three independent experiments.
