# Supplementary material for: Characterisation of the GRAF gene promoter and its methylation in patients with acute myeloid leukaemia and myelodysplastic syndrome
Source: PubMed Central journal article supplement (PMC2361128; doi:10.1038/sj.bjc.6602939), 2006-01-10

**GRAF Promoter fragments**

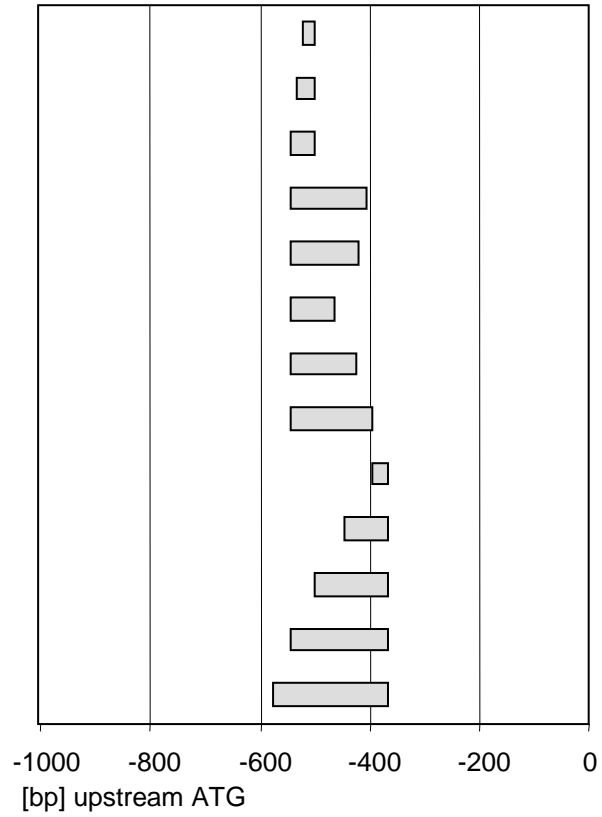

**Relative activity (SV40= 100%)**

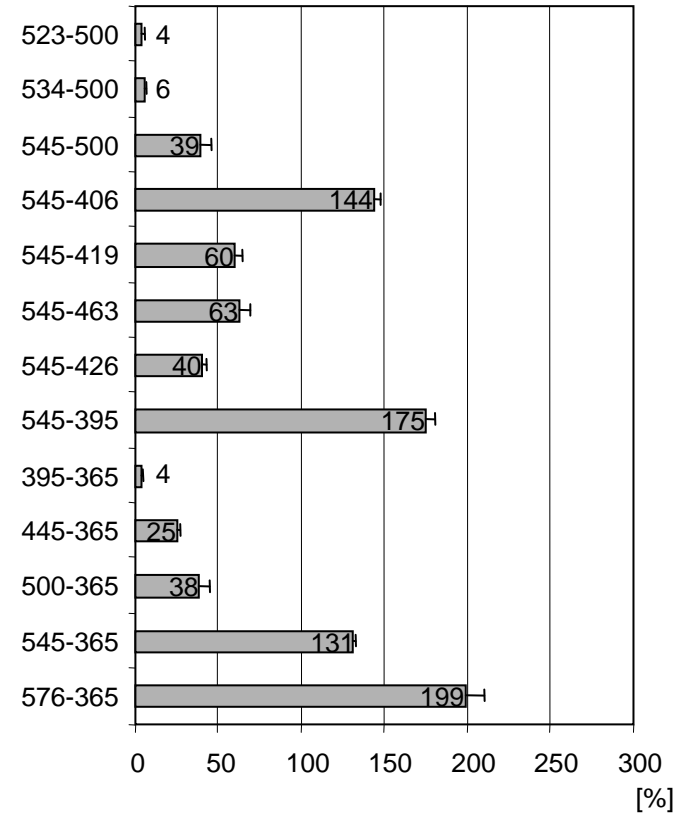

Supplement: 94-6602939x2.pdf [file 94-6602939x2.pdf]
